# Supplementary material for: High‐Performance Ammonium Cobalt Phosphate Nanosheet Electrocatalyst for Alkaline Saline Water Oxidation
Source: PubMed Central journal article supplement (PMC8292903; doi:10.1002/advs.202100498), 2021-05-16
Supplement: ADVS-8-2100498-s001.pdf [file ADVS-8-2100498-s001.pdf]

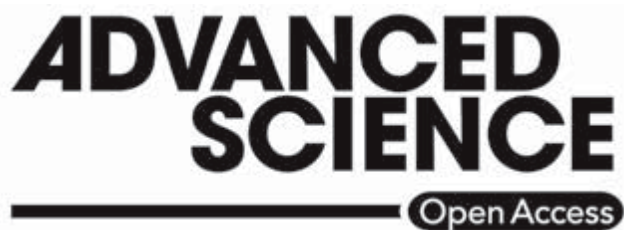

## Supporting Information

for *Adv. Sci.*, DOI: 10.1002/advs.202100498

### High-performance Ammonium Cobalt Phosphate Nanosheet Electrocatalyst for Alkaline Saline Water Oxidation

Zhongxin Song<sup>a</sup>, Kaixi (Cathy) Wang<sup>bc</sup>, Qian Sun<sup>b</sup>, Lei Zhang<sup>b</sup>, Junjie Li<sup>b</sup>, Dingjiu Li<sup>a</sup>, Pok-Wai Sze<sup>a</sup>, Yue Liang<sup>a</sup>, Xueliang Sun<sup>b</sup>, Xian-Zhu Fu<sup>a</sup>, Jing-Li Luo<sup>a,\*</sup>

## Supporting Information

### High-performance Ammonium Cobalt Phosphate Nanosheet Electrocatalyst for Alkaline Saline Water Oxidation

Zhongxin Song <sup>a</sup>, Kaixi (Cathy) Wang <sup>bc</sup>, Qian Sun <sup>b</sup>, Lei Zhang <sup>b</sup>, Junjie Li <sup>b</sup>, Dingjiu Li <sup>a</sup>, Pok-Wai Sze <sup>a</sup>, Yue Liang <sup>a</sup>, Xueliang Sun <sup>b</sup>, Xian-Zhu Fu <sup>a</sup>, Jing-Li Luo <sup>a,\*</sup>

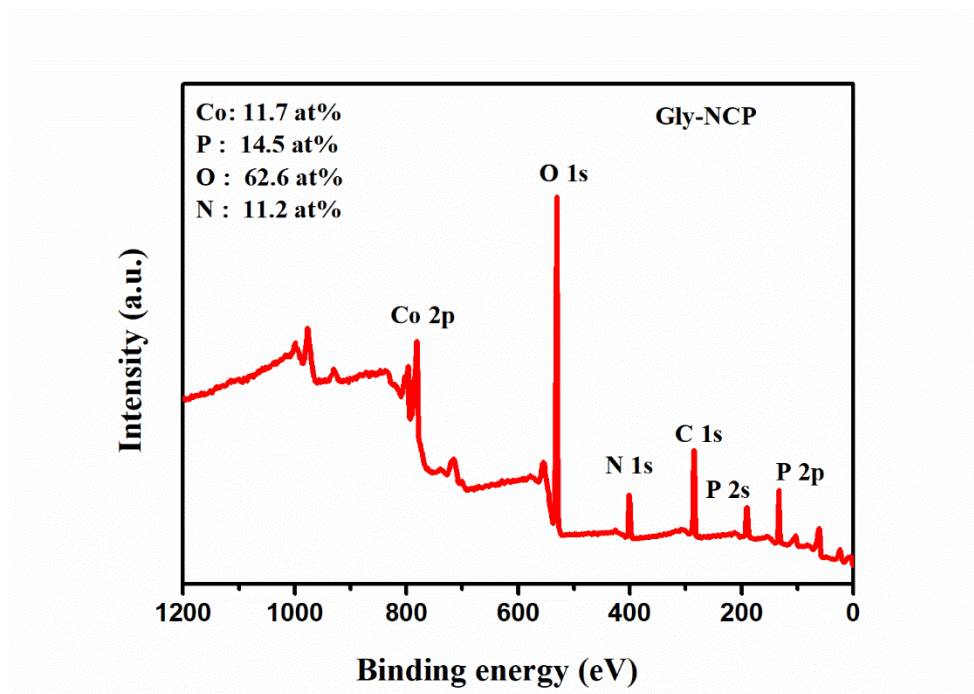

**Figure S1.** The XPS spectrum and element composition of as-prepared Gly-NCP.

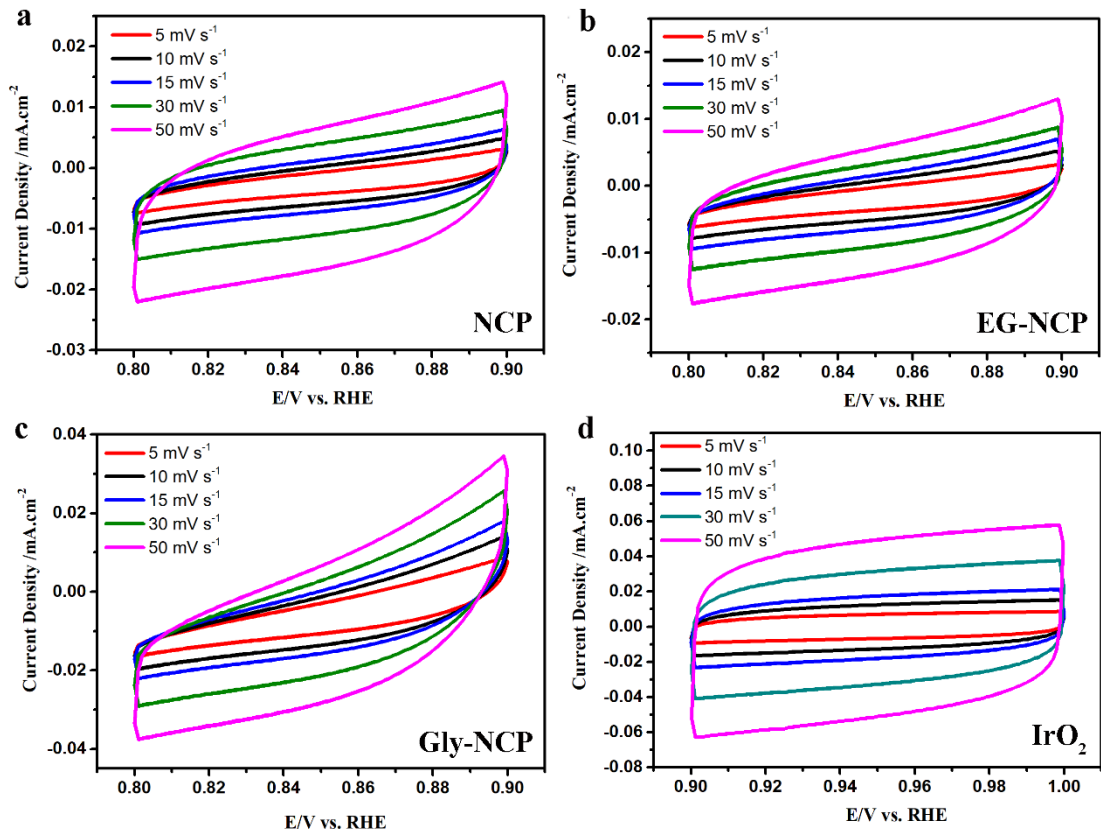

**Figure S2.** The CV curves at different scan rates for NCP, EG-NCP, Gly-NCP nanosheets and the reference of  $\text{IrO}_2$ .

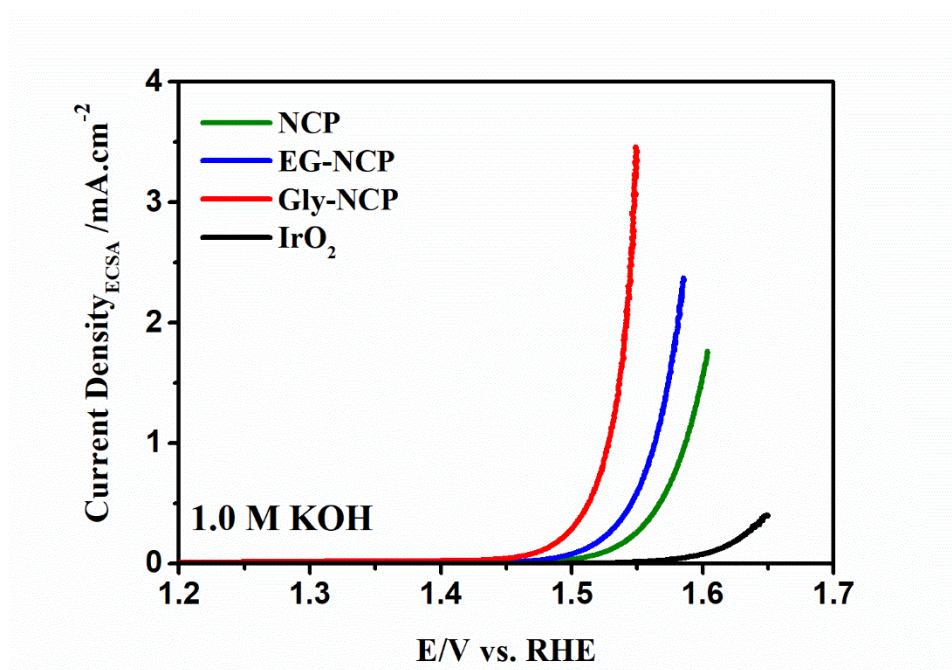

**Figure S3.** The ECSA normalized LSV curves for NCP, EG-NCP, Gly-NCP nanosheets (scan rate: 10 mVs<sup>-1</sup>)

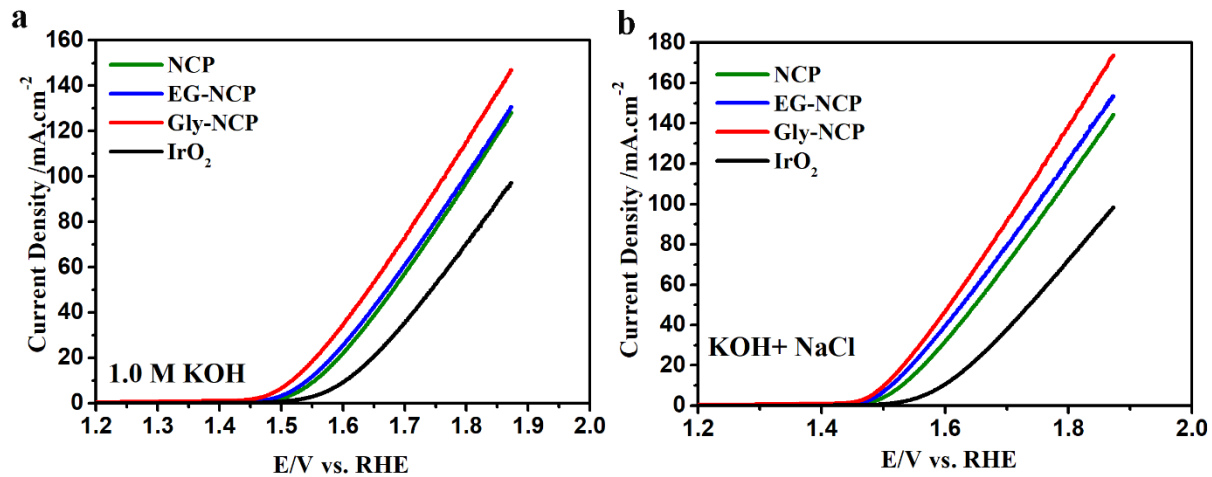

**Figure S4.** The LSV curves for NCP, EG-NCP, Gly-NCP nanosheets in (a) 1.0 M KOH and (b) 1.0 M KOH+0.5 M NaCl before  $jR$  correction (scan rate:  $10 \text{ mV s}^{-1}$ ).

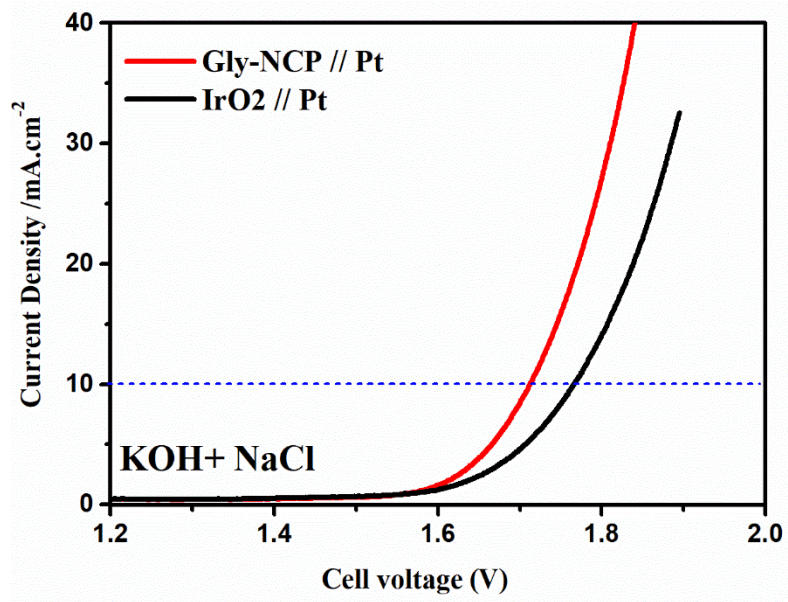

**Figure S5.** The LSV curve for overall alkaline saline water electrolysis of Gly-NCP//Pt and IrO<sub>2</sub>//Pt under two electrode system (scan rate: 10 mVs<sup>-1</sup>).

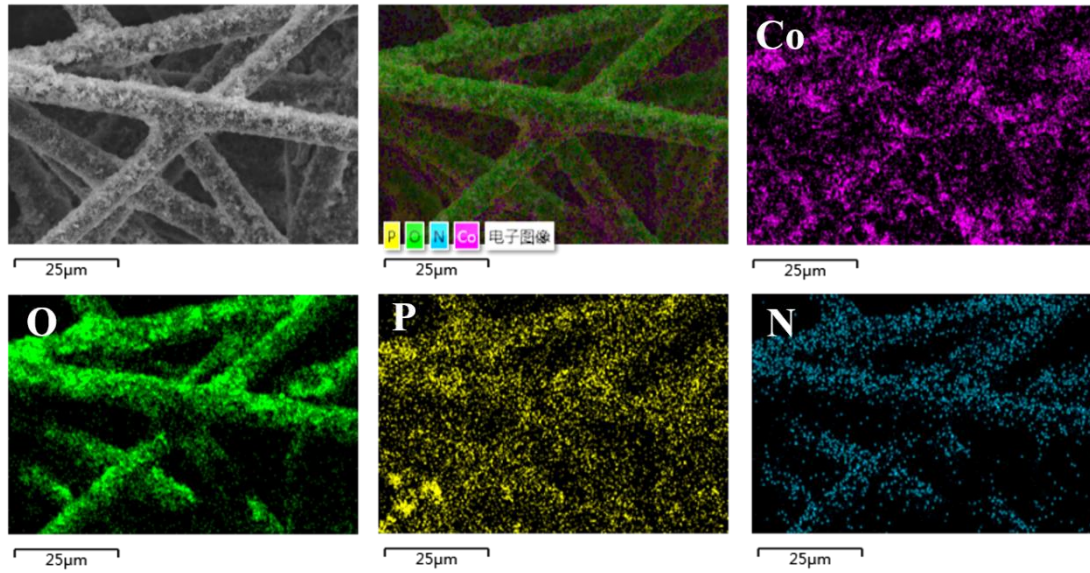

**Figure S6.** The SEM image and EDS maps of Gly-NCP electrode after 20 hours of stability test in 1.0 M KOH+0.5 M NaCl.

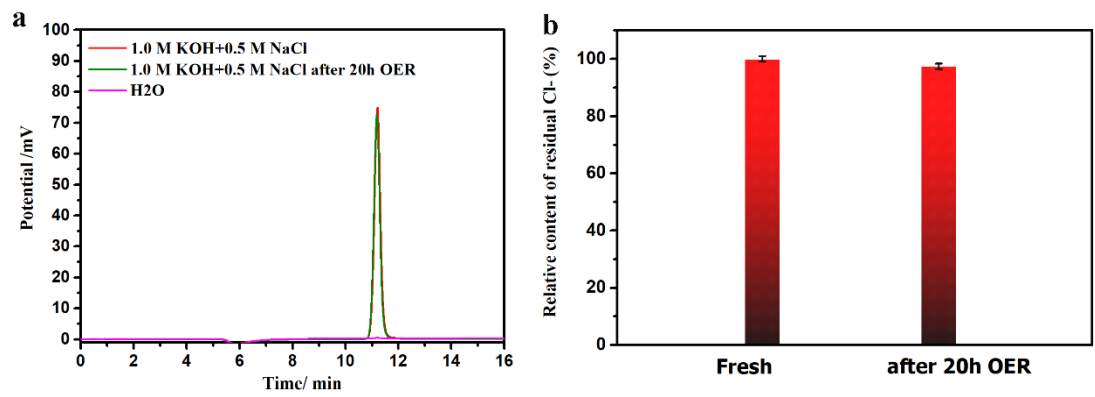

**Figure S7.** The Ion-Chromatography traces of diluted electrolyte (a) and relative content of residual Cl<sup>-</sup> in KOH+NaCl electrolyte (b) before and after 20 h OER test catalyzed by Gly-NCP at 10 mA cm<sup>-2</sup>.



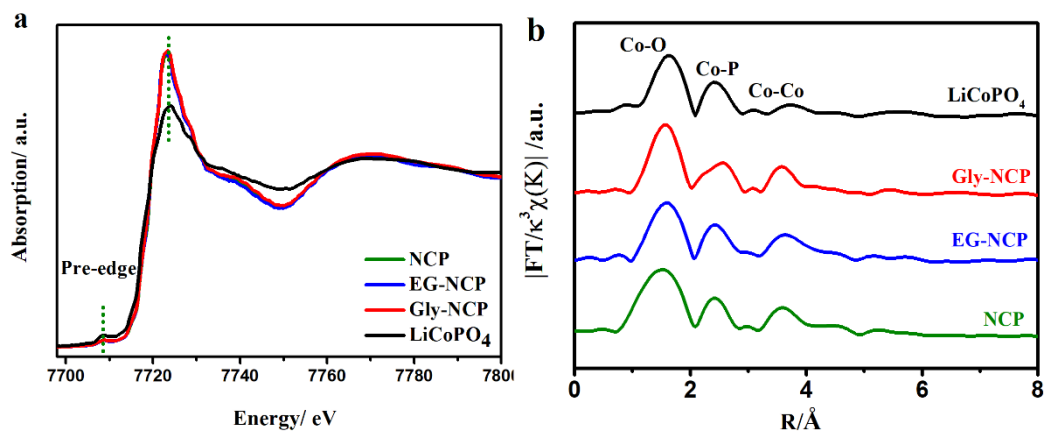

**Figure S8.** (a) XANES spectra and (b) FT-EXAFS spectra of as-prepared NCP, EG-NCP, Gly-NCP nanosheets and the reference of LiCoPO<sub>4</sub>.

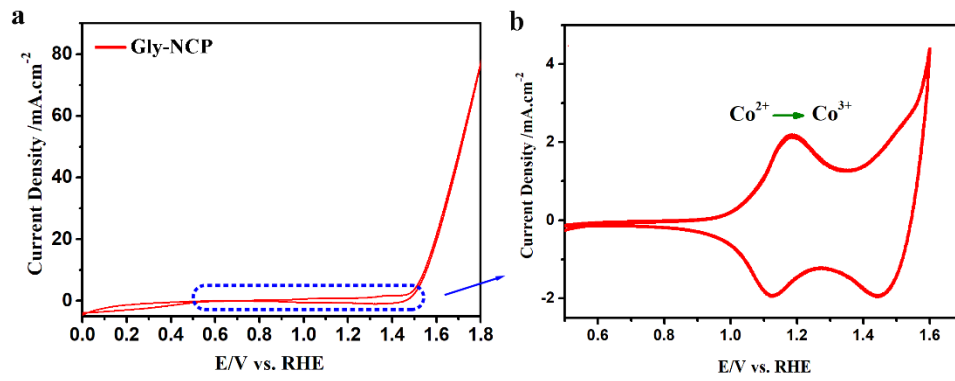

**Figure S9.** The CV curve of Gly-NCP electrode in 1.0 M KOH+0.5 M NaCl (scan rate: 50 mVs<sup>-1</sup>).

**Table S1.** Comparison of electrocatalytic activity towards seawater oxidation for recently reported electrocatalysts

| Electrocatalysts                                                                | Electrolyte                | Overpotential                     | Tafel slope<br>mVdec <sup>-1</sup> | Stability                                    | Reference |
|---------------------------------------------------------------------------------|----------------------------|-----------------------------------|------------------------------------|----------------------------------------------|-----------|
| 3D core-shell NiMoN@NiFeN                                                       | 1.0 M KOH + 0.5 M NaCl     | 286 mV @ 100 mA cm <sup>-2</sup>  | -                                  | Current increase <10% after 100 h            | [1]       |
| Na <sub>2</sub> Co <sub>1-x</sub> Fe <sub>x</sub> P <sub>2</sub> O <sub>7</sub> | 0.5 M NaCl + 0.1 M KOH     | 285 mV @ 100 mA cm <sup>-2</sup>  | 56                                 | 40 mV increase after 100 h                   | [2]       |
| Ni <sub>2</sub> P-Fe <sub>2</sub> P                                             | 1 M KOH seawater           | 305 mV @ 100 mA cm <sup>-2</sup>  | -                                  | 36 h stable at 100 mA cm <sup>-2</sup>       | [3]       |
| NiFe/NiS <sub>x</sub> -Ni foam                                                  | 1 M KOH+ 0.5 M NaCl        | 380 mV @ 1500 mA cm <sup>-2</sup> | -                                  | 500 h stable at 400-1000 mA cm <sup>-2</sup> | [4]       |
| S-(Ni,Fe)OOH                                                                    | 1 M KOH+ 0.5 M NaCl        | 278 mV @ 100 mA cm <sup>-2</sup>  | 48.9                               | 100 h stable at 100 mA cm <sup>-2</sup>      | [5]       |
| NiFe-LDH                                                                        | 0.1 M KOH+0.5m NaCl        | 359 mV @ 10 mA cm <sup>-2</sup>   | 50                                 | 480 mV increase after 2h operation           | [6]       |
| NiCo-DEA                                                                        | seawater                   | Onset potential of 1.31 V         | 51                                 | Keep 96% current after 8h at 1.5 V           | [7]       |
| NiNS                                                                            | Overall seawater splitting | 48.3 mA cm <sup>-2</sup> at 1.8 V | 112                                | Stable during 12 h operation                 | [8]       |
| Gly-NCP                                                                         | 1.0 M KOH + 0.5 M NaCl     | 268 mV @ 100 mA cm <sup>-2</sup>  | 39                                 | 13 mV increase after 20h operation           | This work |

## References

- [1] L. Yu, Q. Zhu, S. W. Song, B. McElhenny, D. Z. Wang, C. Z. Wu, Z. J. Qin, J. M. Bao, Y. Yu, S. Chen, Z. F. Ren, *Nat. Commun.* **2019**, 10, 10.
- [2] H. J. Song, H. Yoon, B. Ju, D. Y. Lee, D. W. Kim, *Acs Catalysis* **2020**, 10, 702.
- [3] L. Wu, L. Yu, F. Zhang, B. McElhenny, D. Luo, A. Karim, S. Chen, Z. Ren, *Adv. Funct. Mater.* **2021**, 31, 2006484.
- [4] Y. Kuang, M. J. Kenney, Y. T. Meng, W. H. Hung, Y. J. Liu, J. E. Huang, R. Prasanna, P. S. Li, Y. P. Li, L. Wang, M. C. Lin, M. D. McGehee, X. M. Sun, H. J. Dai, *Proc. Natl. Acad. Sci. U. S. A.* **2019**, 116, 6624.
- [5] L. Yu, L. Wu, B. McElhenny, S. Song, D. Luo, F. Zhang, Y. Yu, S. Chen, Z. Ren, *Energy Environ. Sci.* **2020**, 13, 3439.
- [6] F. Dionigi, T. Reier, Z. Pawolek, M. Gliech, P. Strasser, *ChemSusChem* **2016**, 9, 962.
- [7] J. J. Zheng, *Electrochim. Acta* **2017**, 247, 381.
- [8] Y. Q. Zhao, B. Jin, A. Vasileff, Y. Jiao, S. Z. Qiao, *Journal of Materials Chemistry A* **2019**, 7, 8117.
